# Supplementary material
Source: PubMed Central journal article supplement (PMC4672989)
Supplement: NIHMS693414-supplement-supplement_1.pdf [file NIHMS693414-supplement-supplement_1.pdf]

**Supplemental Table 1.**

|                                                     | <b>Included<br/>(n=253)</b> | <b>Excluded<br/>(n=518)</b> | <b>p-value</b> |
|-----------------------------------------------------|-----------------------------|-----------------------------|----------------|
| <b>Age, yrs</b>                                     | 56.4(14.0)                  | 57.5(14.4)                  | 0.32           |
| <b>Male sex, n(%)</b>                               | 140(55)                     | 315(61)                     | 0.15           |
| <b>African American,<br/>n(%)<sup>±</sup></b>       | 203(81)                     | 269(52)                     | <0.001         |
| <b>Diabetes mellitus, n(%)</b>                      | 108(43)                     | 249(48)                     | 0.16           |
| <b>Peripheral Vascular<br/>Disease, n(%)</b>        | 22(9)                       | 52(10)                      | 0.55           |
| <b>ESRD vintage (yrs)</b>                           | 3.4(1.7,7.9)                | 3.2(1.4,6.6)                | 0.005          |
| <b>Albumin (g/dl)</b>                               | 4.0(0.36)                   | 4.0(0.36)                   | 0.41           |
| <b>Hemoglobin (g/dl)</b>                            | 11.9(3.7)                   | 11.7(1.9)                   | 0.33           |
| <b>Arterio-venous Fistula,<br/>n(%)<sup>χ</sup></b> | 134(53)                     | 342(67)                     | <0.001         |
| <b>ICW<sup>†*</sup> (L)</b>                         | 21.8(5.1)                   | 21.9(5.7)                   | 0.71           |
| <b>ECW<sup>°*</sup> (L)</b>                         | 19.2(4.4)                   | 19.2(4.9)                   | 0.99           |
| <b>Fat mass* (kg)</b>                               | 24.8(13.6)                  | 24.9(12.8)                  | 0.94           |

<sup>±</sup>Includes 1 missing value

Values are mean (sd) for normally distributed variables and median (25th, 75th percentile) for non-normally distributed continuous variables.

<sup>χ</sup>Includes 6 missing values

\*Data for 82% of study population with bioimpedance spectroscopy performed

<sup>†</sup>Intracellular water

<sup>°</sup>Extracellular water
